# Supplementary material
Source: publisher figshare collection journal article supplement (https://sage.figshare.com/ndownloader/files/12844136)
Supplement: Supplementary file 1 [file 12844136]

**Supplemental Material for**

**Working memory in older adults declines with age, but is modulated by sex and education**

Christos Pliatsikas, João Veríssimo, Laura Babcock, Mariel Y. Pullman, Dana A. Glei, Maxine Weinstein, Noreen Goldman, and Michael T. Ullma

Table S1. Number of participants and mean years of education (and SDs) presented in 5-year age brackets, for each sex and across both sexes

|  | N | | |  | Mean years of education (SD) | | |
| --- | --- | --- | --- | --- | --- | --- | --- |
|  | Male | Female | Total |  | Male | Female | Total |
| 55-59 (min. age 58) | 43 | 42 | 85 |  | 10.49 (3.65) | 9.00 (3.94) | 9.75 (3.84) |
| 60-64 | 128 | 130 | 258 |  | 10.09 (3.95) | 7.90 (4.19) | 8.99 (4.21) |
| 65-69 | 61 | 64 | 125 |  | 8.15 (4.05) | 6.23 (3.84) | 7.17 (4.05) |
| 70-74 | 54 | 38 | 92 |  | 8.06 (4.25) | 2.95 (4.38) | 5.95 (4.97) |
| 75-79 | 42 | 39 | 81 |  | 5.81 (4.28) | 2.82 (3.60) | 4.37 (4.22) |
| 80-84 | 48 | 27 | 75 |  | 7.00 (4.24) | 3.74 (3.19) | 5.83 (4.18) |
| 85-89 | 22 | 16 | 38 |  | 7.73 (4.54) | 3.06 (3.94) | 5.76 (4.84) |
| Whole sample | 398 | 356 | 754 |  | 8.61 (4.33) | 6.11 (4.56) | 7.43 (4.61) |

Note. This table displays sample sizes and educational information in 5-year age brackets for informational purposes only. We remind readers that all analyses were performed with age as a continuous variable.
